# Supplementary material for: A wrinkled structure of gold film greatly improves the signaling of electrochemical aptamer-based biosensors
Source: PubMed Central journal article supplement — RSC Adv. 2021 Jan 6;11(2):671–7. doi: 10.1039/d0ra09174j (PMC8693351; doi:10.1039/d0ra09174j), 2021-01-06
Supplement: RA-011-D0RA09174J-s001.pdf [file RA-011-D0RA09174J-s001.pdf]

**UPDATED 19<sup>th</sup> January 2021. The original version of this ESI was first published on 06 January 2021. This version of the ESI replaces the previous version in which Figure S2 was not shown correctly.**

## Supporting Information

# A wrinkled structure of gold film greatly improves the signaling of electrochemical aptamer-based biosensor

Shaoguang Li,<sup>a</sup> Lancy Lin,<sup>b</sup> Xueman Chang,<sup>a</sup> Zhixiao Si,<sup>a</sup> Kevin W.

Plaxco,<sup>c,d</sup> Michelle Khine,<sup>b</sup> Hui Li \*<sup>a</sup> and Fan Xia<sup>a</sup>

*<sup>a</sup>Engineering Research Center of Nano-Geomaterials of Ministry of Education, Faculty of Materials Science and Chemistry, China University of Geosciences, Wuhan 430074, China; <sup>b</sup>Department of Biomedical Engineering, University of California, Irvine, Irvine, CA 92697, United States; <sup>c</sup>Department of Chemistry and Biochemistry, University of California Santa Barbara, Santa Barbara, California 93106, United States <sup>d</sup>. Center for Bioengineering, University of California Santa Barbara, Santa Barbara, California 93106, United States, E-mail: [lihui-chem@cug.edu.cn](mailto:lihui-chem@cug.edu.cn)*

## Table of Content

|                      |           |
|----------------------|-----------|
| <b>Fig. S1</b> ..... | <b>S3</b> |
| <b>Fig. S2</b> ..... | <b>S3</b> |
| <b>Fig. S3</b> ..... | <b>S4</b> |
| <b>Fig. S4</b> ..... | <b>S4</b> |

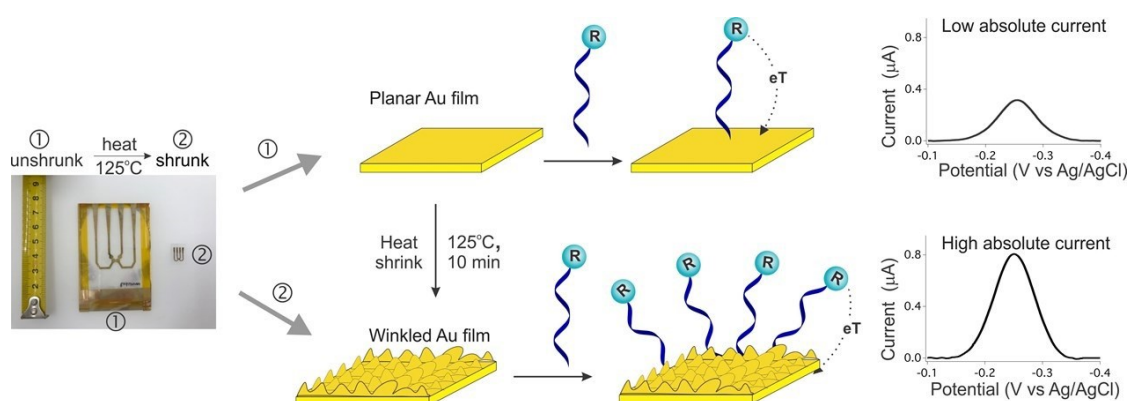

**Fig. S1** E-AB sensors using wrinkled electrodes as immobilizing substrate achieve a greatly improved signaling. The optical image (left) illustrates the size and geometry of Au film before shrunk and after. While the planar electrode has a limited surface area and thus allows a minimal of probes to be attached, the wrinkled one exhibits a greatly improved surface area, thus allowing a greater total amount of probes for attachment and producing a higher signal.

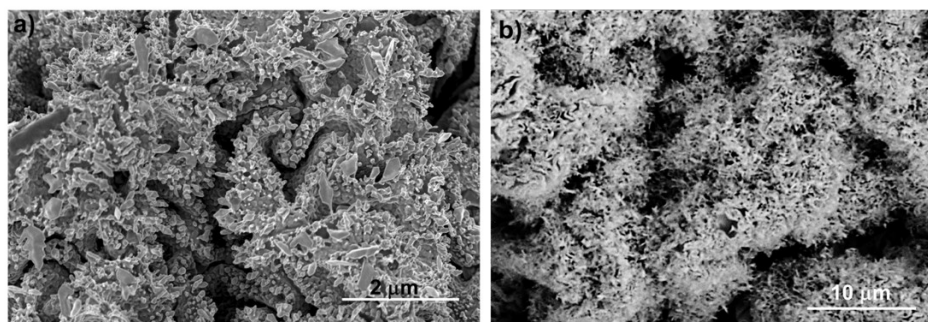

**Fig. S2** Scanning electron microscopy of a) wrinkled Au electrode and b) wrinkled sensor modified by octa(3-mercaptopropyl)octasilsesquioxane (SH8-POSS).

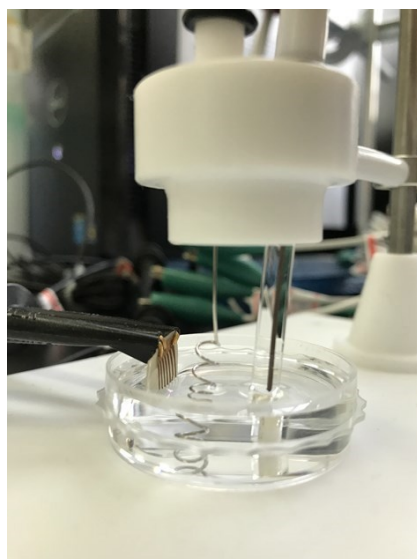

**Fig. S3** The experiment exploits three-electrodes setup, using Ag/AgCl as reference electrode, Pt as counter electrode and Au-coating film as working electrodes, i.e., the sensor. Illustration is the setup for interrogating sensors that fabricated from shrink-induced, wrinkled substrate.

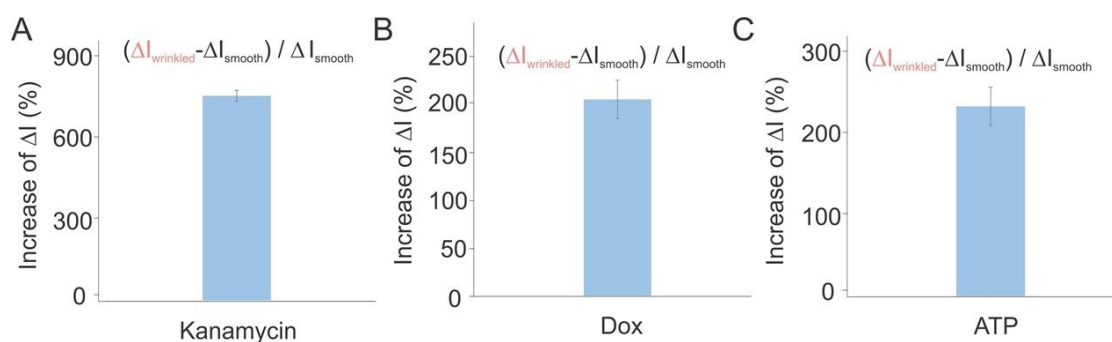

**Fig. S4** The current difference between baseline (non-target) and saturation (saturated target), is significantly enhanced by the use of wrinkled electrodes. (A) Kanamycin-detecting sensors fabricated from wrinkled electrodes exhibited a greatly improved current by 750% compared to those from the smooth electrodes. (B) and (C) Doxorubicin- and ATP-detecting sensors from wrinkled electrodes, likewise, exhibited a ~200% increase in current change in comparison to those from smooth ones.
